# Supplementary material
Source: PubMed Central journal article supplement (PMC2746864)
Supplement: NIHMS139282-supplement-Supp_Tab.pdf [file NIHMS139282-supplement-Supp_Tab.pdf]

Table S1. Half-life of wt-TfR2 and K31A-TfR2.

|           | control          | 25 $\mu$ M holo-Tf |
|-----------|------------------|--------------------|
| wt-TfR2   | 3.3 $\pm$ 0.2 hr | 8.9 $\pm$ 3.0 hr   |
| K31A-TfR2 | 4.8 $\pm$ 2.5 hr | 8.5 $\pm$ 5.2 hr   |

Hep3B/TfR2 and Hep3B/K31A-TfR2 cells were labeled with [<sup>35</sup>S] Met/Cys and chased for 0 to 12 hr followed by immunoprecipitation and quantification as described previously Johnson *et al.*, 2007 . The half-life (hr) of wt-TfR2 and K31A-TfR2 were presented as the average data from two and five independent experiments, respectively.
