# Supplementary material
Source: PubMed Central journal article supplement (PMC2746864)

Figure S1

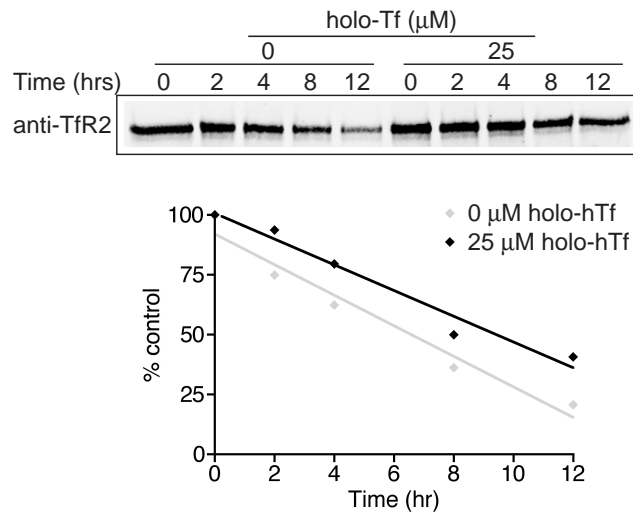

Supplement: NIHMS139282-supplement-Supp_Fig_01.pdf [file NIHMS139282-supplement-Supp_Fig_01.pdf]

Figure S2

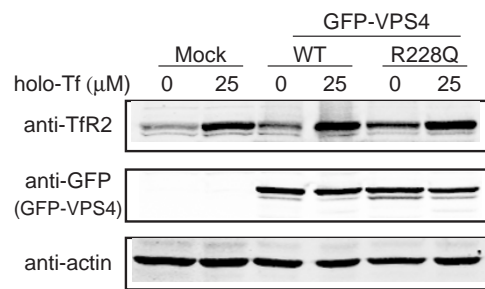

Supplement: NIHMS139282-supplement-Supp_Fig_02.pdf [file NIHMS139282-supplement-Supp_Fig_02.pdf]

Figure S3

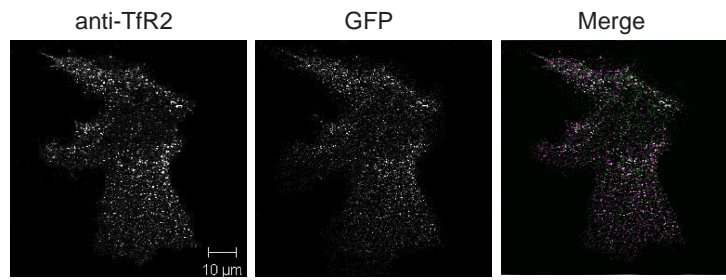

Supplement: NIHMS139282-supplement-Supp_Fig_03.pdf [file NIHMS139282-supplement-Supp_Fig_03.pdf]

Figure S4

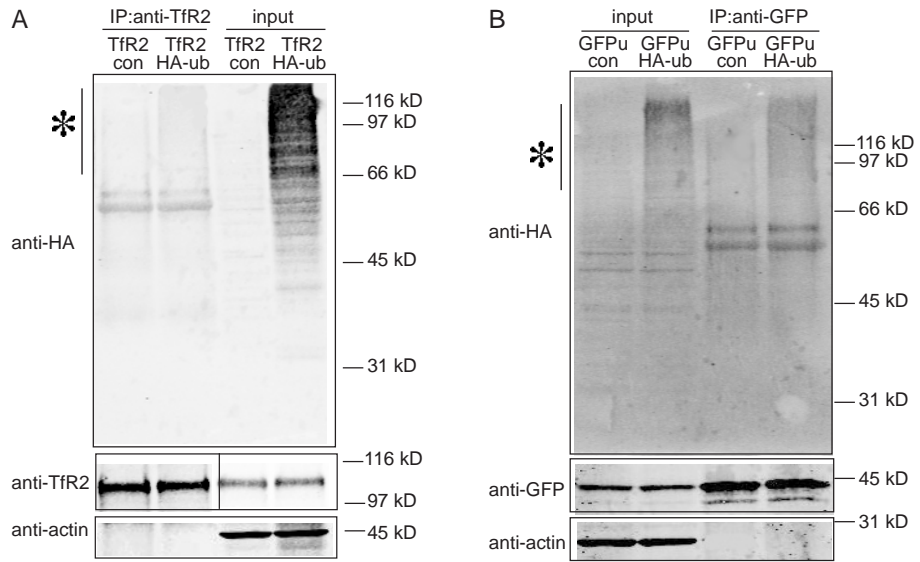

Supplement: NIHMS139282-supplement-Supp_Fig_04.pdf [file NIHMS139282-supplement-Supp_Fig_04.pdf]
